# Supplementary material
Source: PubMed Central journal article supplement (PMC5210051)
Supplement: PulmCirc-006-483.s001.pdf [file PulmCirc-006-483.s001.pdf]

**Appendix from Gaskill et al., “Shared gene expression patterns in mesenchymal progenitors derived from lung and epidermis in pulmonary arterial hypertension: identifying key pathways in pulmonary vascular disease”  
(Pulm. Circ., vol. 6, no. 4, p. 483)**

Table S1. Reagent information

| Gene/protein | Human qRT-PCR primer: forward | Human qRT-PCR primer: reverse | Antibody             |
|--------------|-------------------------------|-------------------------------|----------------------|
| <i>DKK1</i>  | Hs00183740_m1                 | (Taqman)                      |                      |
| <i>WISP1</i> | AGGAACTGCATAGCCTACACA         | TGGTACACAGCCAGACACTTC         |                      |
| <i>TNC</i>   | TGCGAAGAAGGCTTCACA            | TACACATTTGCCCTCGACAC          |                      |
| <i>NEO1</i>  | GGAGCCGGTGGATACACTCT          | TGGCGTCGATCATCTGATACTA        |                      |
| <i>RGS5</i>  | CGGAGGCTCCTAAAGAGGTG          | CAAAGCGAGGCAGAGAATCC          |                      |
| <i>SPON2</i> | CGGCCAAATACAGCATCACC          | CCCAGCAGCGAAGACCACT           |                      |
| <i>WLS</i>   | ATGAGGGCCGTTACTATGAATGT       | CCTTGGTGAAGCCTCCATTTTG        |                      |
| <i>LRP6</i>  | ACGATTGTAGTTGGAGGCTTG         | ATGGCTTCTTCGCTGACATCA         |                      |
| <i>PTGS2</i> | Hs00153133_m1                 | (Taqman)                      |                      |
| <i>PEAR1</i> | Hs01378394_m1                 | (Taqman)                      |                      |
| <i>PDK4</i>  | Hs01037712_m1                 | (Taqman)                      |                      |
| LRP6         |                               |                               | Santa Cruz SC-25317  |
| DKK1         |                               |                               | Santa Cruz SC-374574 |

Note: qRT-PCR: quantitative reverse transcription polymerase chain reaction.

Table S2. Differential gene expression between PAH and control MPCs

| Gene             | PAH versus control |                | Gene            | PAH versus control |                |
|------------------|--------------------|----------------|-----------------|--------------------|----------------|
|                  | Fold change        | <i>P</i> value |                 | Fold change        | <i>P</i> value |
| <i>ABCA8</i>     | -5.74566           | 0.000426918    | <i>P4HA3</i>    | -3.71075           | 0.00359561     |
| <i>ACAD11</i>    | -3.02428           | 0.0115302      | <i>PAR4</i>     | -2.29911           | 0.0279132      |
| <i>ACSS3</i>     | -2.30662           | 0.00832764     | <i>PARP8</i>    | -2.05851           | 0.0108406      |
| <i>ADAM23</i>    | -2.53986           | 0.0426075      | <i>PARP9</i>    | 2.26876            | 0.00347152     |
| <i>ADAMTS19</i>  | -2.26564           | 0.00381684     | <i>PCDHB2</i>   | -2.28736           | 0.0145255      |
| <i>API3</i>      | -2.1376            | 0.0105606      | <i>PCDHB5</i>   | -2.2907            | 0.00488807     |
| <i>ARNTL2</i>    | 2.01563            | 0.030135       | <i>PCOLCE2</i>  | -2.75813           | 0.0368619      |
| <i>ASAH1</i>     | -2.04675           | 0.0021534      | <i>PDK4</i>     | -2.98576           | 4.00E-05       |
| <i>BGN</i>       | 2.44454            | 0.0365964      | <i>PEAR1</i>    | 2.12031            | 0.00635016     |
| <i>BMP6</i>      | -2.22251           | 0.00389416     | <i>PGM2L1</i>   | -2.99221           | 0.00011248     |
| <i>BRIP1</i>     | 2.32996            | 0.0309359      | <i>PLAT</i>     | -4.53043           | 0.025726       |
| <i>CCL20</i>     | -3.3151            | 0.00378156     | <i>PPP1R3C</i>  | -2.64459           | 0.034272       |
| <i>CCND2</i>     | -5.5355            | 0.0155638      | <i>PTGS2</i>    | -5.5725            | 0.040118       |
| <i>CENPI</i>     | 2.9553             | 0.0338275      | <i>PTHLH</i>    | -2.18944           | 0.00901834     |
| <i>CHN1</i>      | 2.40679            | 0.0194867      | <i>PTTG1</i>    | 2.69096            | 0.0355188      |
| <i>CPE</i>       | -2.1992            | 0.0392921      | <i>RELN</i>     | -4.75644           | 0.0329863      |
| <i>CTSC</i>      | 2.19773            | 0.020409       | <i>RGS5</i>     | -3.45307           | 0.00629714     |
| <i>CXCL10</i>    | 2.5709             | 0.00461782     | <i>ROBO2</i>    | -2.38973           | 0.000585671    |
| <i>DKK1</i>      | -2.27936           | 0.0201554      | <i>SAT1</i>     | -2.70967           | 0.0129793      |
| <i>DOCK10</i>    | 2.32133            | 0.00869289     | <i>SATB1</i>    | -2.99009           | 5.53E-06       |
| <i>DTX3L</i>     | 2.25824            | 0.00192234     | <i>SCG2</i>     | -3.14705           | 0.000159118    |
| <i>EPGN</i>      | -2.73003           | 0.0125658      | <i>SCG5</i>     | -2.91574           | 0.0235747      |
| <i>FAM183B</i>   | 2.44479            | 0.00221733     | <i>SERPINE2</i> | -3.63115           | 0.0132981      |
| <i>FGL2</i>      | -8.19764           | 0.0102414      | <i>SERPINI1</i> | -2.54572           | 0.00190024     |
| <i>FLRT2</i>     | -2.23673           | 0.0167511      | <i>SESN3</i>    | -5.88877           | 0.000105984    |
| <i>GLB1L</i>     | -2.62377           | 0.00348021     | <i>SKA3</i>     | 3.47573            | 0.0438041      |
| <i>H2AFZ</i>     | 2.45075            | 0.0338116      | <i>SLC14A1</i>  | 2.97187            | 0.0335797      |
| <i>HAS2</i>      | 3.04969            | 0.036305       | <i>SLC1A1</i>   | -2.66717           | 0.0492348      |
| <i>HIST1H1E</i>  | 3.19816            | 0.0428945      | <i>SLC38A11</i> | -2.39641           | 0.00853225     |
| <i>HIST1H4B</i>  | 2.22934            | 0.0499595      | <i>SLC39A8</i>  | -2.01716           | 0.0113132      |
| <i>HIST2H2AB</i> | 3.21531            | 0.0231178      | <i>SLC40A1</i>  | -4.08569           | 0.045058       |
| <i>HIST2H2BE</i> | -2.35754           | 0.0185113      | <i>SNAP25</i>   | -2.17275           | 0.0364734      |
| <i>HTATSF1P2</i> | 3.61831            | 0.00167649     | <i>SNRPN</i>    | -2.88561           | 0.0205426      |
| <i>IFI44</i>     | 2.36029            | 0.0123215      | <i>SPON2</i>    | 2.16564            | 0.0386202      |
| <i>IFIT1</i>     | 2.81063            | 0.0300291      | <i>STEAP1</i>   | 2.01976            | 0.0471408      |
| <i>IFIT3</i>     | 2.14972            | 0.00241179     | <i>TCF19</i>    | 2.35564            | 0.0330562      |
| <i>KIAA0101</i>  | 2.78886            | 0.0499342      | <i>TCF19</i>    | 2.2882             | 0.0348311      |
| <i>KIAA1377</i>  | -2.36545           | 0.0383475      | <i>TNC</i>      | 3.29154            | 0.00975554     |
| <i>KLF4</i>      | -2.16152           | 0.04311        | <i>TNFRSF1B</i> | -2.30988           | 0.0317549      |
| <i>LBR</i>       | 2.40004            | 0.0060019      | <i>TNXA</i>     | -3.03839           | 0.00362081     |
| <i>LGMN</i>      | -2.35556           | 0.00652633     | <i>TNXB</i>     | -3.07654           | 0.00396426     |

Table S2 (Continued)

| Gene         | PAH versus control |           | Gene         | PAH versus control |            |
|--------------|--------------------|-----------|--------------|--------------------|------------|
|              | Fold change        | P value   |              | Fold change        | P value    |
| <i>LIPH</i>  | -3.34977           | 0.0131982 | <i>TOX2</i>  | 2.31942            | 1.62E-05   |
| <i>LPHN2</i> | -3.71932           | 0.0229826 | <i>TRHDE</i> | 2.18208            | 0.0415992  |
| <i>MAOA</i>  | -3.75233           | 0.0194706 | <i>TRPV2</i> | 2.65022            | 0.00301275 |
| <i>MEDAG</i> | -6.02268           | 0.0290316 | <i>TYMS</i>  | 3.46746            | 0.0325237  |
| <i>MME</i>   | 2.74555            | 0.0151204 | <i>VCAN</i>  | -2.77318           | 0.00759963 |
| <i>NEO1</i>  | 2.37015            | 0.0329007 | <i>WLS</i>   | -2.07564           | 0.0328988  |
| <i>NRM</i>   | 2.15887            | 0.0399557 | <i>XAF1</i>  | 2.22607            | 0.00747729 |
| <i>NUF2</i>  | 3.26221            | 0.047235  |              |                    |            |
| <i>NXF3</i>  | -2.02669           | 0.0166706 |              |                    |            |

Note: MPCs: mesenchymal progenitor cells; PAH: pulmonary arterial hypertension.

Table S3. Gene expression common in lung and skin mesenchymal progenitor cells relative to lung fibroblasts

| Gene          | Adjusted P value | Gene            | Adjusted P value | Gene            | Adjusted P value |
|---------------|------------------|-----------------|------------------|-----------------|------------------|
| <i>KARS</i>   | 0.003754665      | <i>CCND2</i>    | 0.0118961        | <i>SHROOM3</i>  | 0.003670784      |
| <i>EIF3F</i>  | 0.000481415      | <i>CRACR2A</i>  | 0.013054831      | <i>NFKB1</i>    | 0.00966527       |
| <i>GDI2</i>   | 0.003475123      | <i>GNS</i>      | 0.010886852      | <i>USP53</i>    | 0.008091899      |
| <i>HNRNPD</i> | 0.001742548      | <i>EEA1</i>     | 0.003672702      | <i>MSMO1</i>    | 0.00427293       |
| <i>HINT1</i>  | 0.001521358      | <i>AKAP11</i>   | 0.006968455      | <i>SH3D19</i>   | 0.012597167      |
| <i>MCTP2</i>  | 0.002305372      | <i>MIPEP</i>    | 0.000413416      | <i>DMXL1</i>    | 0.019848346      |
| <i>TCEB2</i>  | 0.00540237       | <i>FLRT2</i>    | 0.016810132      | <i>PRDM6</i>    | 0.005593715      |
| <i>YY1</i>    | 0.004252223      | <i>GPHB5</i>    | 0.032152095      | <i>CSNK1G3</i>  | 0.008915714      |
| <i>RNPS1</i>  | 0.015067654      | <i>TRIP11</i>   | 0.00427293       | <i>GM2A</i>     | 0.02849702       |
| <i>KARS</i>   | 0.004654451      | <i>MAP2K5</i>   | 0.019951227      | <i>SQSTM1</i>   | 0.003618116      |
| <i>FNTA</i>   | 0.000287202      | <i>SPG11</i>    | 0.013480302      | <i>HMGCS1</i>   | 0.040399444      |
| <i>NPM1</i>   | 0.008771686      | <i>CNOT6L</i>   | 0.043797907      | <i>COL4A3BP</i> | 0.008843249      |
| <i>IK</i>     | 0.00051101       | <i>VPS13C</i>   | 0.011734291      | <i>HOMER1</i>   | 0.017509619      |
| <i>EIF4G2</i> | 0.007731736      | <i>SLC9A3R2</i> | 0.018675918      | <i>CCDC112</i>  | 0.003205645      |
| <i>PRPF8</i>  | 0.00427293       | <i>MT1X</i>     | 0.012356098      | <i>GNPDA1</i>   | 0.007003414      |
| <i>EIF3D</i>  | 0.016390177      | <i>SLC12A4</i>  | 0.005607752      | <i>DPYSL3</i>   | 0.002353872      |
| <i>OAZ1</i>   | 0.014613998      | <i>LCAT</i>     | 0.005607752      | <i>DUSP1</i>    | 0.012619233      |
| <i>TAF10</i>  | 0.005327146      | <i>CTNS</i>     | 0.003076261      | <i>ZFP62</i>    | 0.004509464      |
| <i>SART3</i>  | 0.013316994      | <i>KRTAP9-1</i> | 0.01081735       | <i>EDN1</i>     | 0.000368188      |
| <i>SART1</i>  | 0.02965512       | <i>WNK4</i>     | 0.002765411      | <i>ACOT13</i>   | 0.004396663      |
| <i>ILF2</i>   | 0.007557336      | <i>SPHK1</i>    | 0.000307472      | <i>PHF3</i>     | 0.014245617      |
| <i>CBX3</i>   | 0.009759887      | <i>ABR</i>      | 0.030489212      | <i>FIG4</i>     | 0.000782556      |
| <i>HINT1</i>  | 0.00328246       | <i>VAT1</i>     | 0.027011742      | <i>GJA1</i>     | 0.013136088      |

Table S3 (Continued)

| Gene            | Adjusted <i>P</i> value | Gene            | Adjusted <i>P</i> value | Gene            | Adjusted <i>P</i> value |
|-----------------|-------------------------|-----------------|-------------------------|-----------------|-------------------------|
| <i>USP22</i>    | 0.007769826             | <i>ARHGAP28</i> | 0.018510553             | <i>CGA</i>      | 0.042434217             |
| <i>EIF4G2</i>   | 0.001317398             | <i>MIB1</i>     | 0.005214734             | <i>GPNMB</i>    | 0.041949672             |
| <i>DAD1</i>     | 0.002940223             | <i>CCDC130</i>  | 0.018938761             | <i>EIF4B</i>    | 0.007142088             |
| <i>HNRNPK</i>   | 0.012513294             | <i>ZNF766</i>   | 0.011302949             | <i>INSIG1</i>   | 0.043790577             |
| <i>NPM1</i>     | 0.001737272             | <i>ZNF845</i>   | 0.002027839             | <i>SEMA3C</i>   | 0.00230772              |
| <i>ANAPC5</i>   | 0.017192235             | <i>ZNF135</i>   | 0.018938761             | <i>SLC25A40</i> | 0.011560029             |
| <i>SEPT2</i>    | 0.004029966             | <i>C3</i>       | 0.035174269             | <i>NAMPT</i>    | 0.010432597             |
| <i>GDI2</i>     | 0.000324036             | <i>ZNF850</i>   | 0.005995346             | <i>WNT2</i>     | 0.031797392             |
| <i>CANX</i>     | 0.015166734             | <i>ZNF780B</i>  | 0.014920479             | <i>SDCBP</i>    | 0.011473718             |
| <i>CAPNS1</i>   | 0.03020659              | <i>SERTAD1</i>  | 0.003998191             | <i>OXR1</i>     | 0.027256608             |
| <i>KAT7</i>     | 0.016235184             | <i>TAF1B</i>    | 0.016549637             | <i>EMC2</i>     | 0.007226713             |
| <i>GUK1</i>     | 0.002504509             | <i>EHBP1</i>    | 0.012115039             | <i>DENND3</i>   | 0.018085302             |
| <i>SEPT14</i>   | 0.018830105             | <i>FER1L5</i>   | 0.018675918             | <i>LONRF1</i>   | 0.020935755             |
| <i>IFI16</i>    | 0.011560029             | <i>GYPC</i>     | 0.003761691             | <i>PSD3</i>     | 0.006978096             |
| <i>DDR2</i>     | 0.003672702             | <i>ACVR2A</i>   | 0.036192987             | <i>RB1CC1</i>   | 0.003244456             |
| <i>ZC3H11A</i>  | 0.011542988             | <i>ADII</i>     | 0.00540237              | <i>GEM</i>      | 0.001479204             |
| <i>GPR137B</i>  | 0.004349162             | <i>NBAS</i>     | 0.01179363              | <i>HRSP12</i>   | 0.014240025             |
| <i>RRAGC</i>    | 0.018146601             | <i>SMC6</i>     | 0.034521649             | <i>EIF3E</i>    | 0.001739213             |
| <i>OMA1</i>     | 0.00911309              | <i>LDAH</i>     | 0.002524608             | <i>JAK2</i>     | 0.015096052             |
| <i>ZNHIT6</i>   | 0.003244456             | <i>LRPPRC</i>   | 0.001444187             | <i>SCAI</i>     | 0.001135774             |
| <i>CDC42SE1</i> | 0.0118961               | <i>LYPD1</i>    | 0.004571177             | <i>PDK3</i>     | 0.012591566             |
| <i>S100A10</i>  | 0.020134342             | <i>GTDC1</i>    | 0.01584706              | <i>MAOB</i>     | 0.026924674             |
| <i>FMOD</i>     | 0.011432404             | <i>TGM2</i>     | 0.018692484             | <i>XAGE3</i>    | 0.014986484             |
| <i>LEFTY2</i>   | 0.020300959             | <i>SLC5A3</i>   | 0.007068372             | <i>MORC4</i>    | 0.011396562             |
| <i>CELF2</i>    | 0.004066829             | <i>APOL6</i>    | 0.016328036             | <i>GPC4</i>     | 0.000108718             |
| <i>IFIT2</i>    | 0.000147613             | <i>TCEA1</i>    | 0.010128669             | <i>GPSM3</i>    | 0.011473718             |
| <i>EXOC6</i>    | 0.000118809             | <i>C3orf14</i>  | 0.02523779              | <i>RASA4</i>    | 0.00427293              |
| <i>SCD</i>      | 0.004288013             | <i>GXYLT2</i>   | 0.009005018             | <i>MRGPRX3</i>  | 0.008692386             |
| <i>MARCH8</i>   | 0.01999115              | <i>DTX3L</i>    | 0.00993769              | <i>SLC25A52</i> | 0.001521358             |
| <i>JMJD1C</i>   | 0.005612215             | <i>CLDN11</i>   | 0.001555164             | <i>SLC25A51</i> | 0.001521358             |
| <i>PPA1</i>     | 0.001250116             | <i>ARMC10</i>   | 0.003796911             | <i>KARS</i>     | 0.003754665             |
| <i>ANO1</i>     | 0.031546574             | <i>CFAP44</i>   | 0.001237906             | <i>EIF3F</i>    | 0.000481415             |
| <i>RNF169</i>   | 0.004265815             | <i>BCHE</i>     | 0.000813023             | <i>GDI2</i>     | 0.003475123             |

Table S4. Differential gene expression between ABCG2-expressing skin and lung mesenchymal progenitor cells

| Gene            | Fold change  | Gene           | Fold change  |
|-----------------|--------------|----------------|--------------|
| <i>ABCA1</i>    | -7.140379375 | <i>KCNJ2</i>   | -11.17813985 |
| <i>ACTC1</i>    | 95.9064689   | <i>LAMA1</i>   | -6.744129897 |
| <i>ADA</i>      | 4.141622168  | <i>LGR4</i>    | 2.714392814  |
| <i>ADAMTS12</i> | -3.258729977 | <i>LIFR</i>    | -3.810556211 |
| <i>ADGRA3</i>   | -3.822489543 | <i>LRP4</i>    | 2.558093918  |
| <i>ADGRG6</i>   | -12.13024322 | <i>LURAP1L</i> | -3.804082107 |
| <i>ADRA2C</i>   | 3.255290428  | <i>MCAM</i>    | 6.967111342  |
| <i>AKAP6</i>    | 10.28542192  | <i>MSX1</i>    | 5.22209982   |
| <i>BCHE</i>     | -5.487451706 | <i>NCALD</i>   | 5.594113689  |
| <i>C5orf30</i>  | 6.225149585  | <i>NCAM1</i>   | 6.92291223   |
| <i>CADPS</i>    | 3.087142808  | <i>NCKAP5</i>  | -3.099513479 |
| <i>CCL2</i>     | -20.1807767  | <i>NRN1</i>    | 72.7478546   |
| <i>CDH10</i>    | 4.813123244  | <i>NTF4</i>    | 3.876836386  |
| <i>CDH18</i>    | 5.362029696  | <i>OLFML2B</i> | 3.951511144  |
| <i>CFH</i>      | -29.66566966 | <i>PDE5A</i>   | -16.36720262 |
| <i>COMP</i>     | 12.8007186   | <i>PERP</i>    | -3.618870672 |
| <i>CTSC</i>     | -8.547382511 | <i>PLAC8</i>   | 5.083368648  |
| <i>DKK1</i>     | 5.50202578   | <i>PODXL</i>   | 22.77536965  |
| <i>DUSP2</i>    | 5.766688863  | <i>PRRX2</i>   | 3.70223168   |
| <i>EMCN</i>     | 7.616999049  | <i>RASD2</i>   | 7.94451159   |
| <i>EMX2</i>     | 5.806593483  | <i>RCAN2</i>   | 3.082643063  |
| <i>ERG</i>      | 6.475541649  | <i>RIMS1</i>   | 3.079968681  |
| <i>EXOC6</i>    | -5.861872829 | <i>RTN4RL1</i> | 3.90925993   |
| <i>FRAS1</i>    | 4.465130742  | <i>SCN9A</i>   | -25.38799166 |
| <i>GCLC</i>     | -5.092460846 | <i>SDPR</i>    | -4.349046474 |
| <i>GDF15</i>    | -9.364839758 | <i>SFRP1</i>   | -9.129036858 |
| <i>GK</i>       | -9.841969507 | <i>SHC3</i>    | -5.652915738 |
| <i>GPC4</i>     | 15.38302986  | <i>SIMI</i>    | 4.173372549  |
| <i>HGF</i>      | -38.06457212 | <i>SLC7A8</i>  | 18.1691909   |
| <i>HOXA9</i>    | 7.436936653  | <i>SMAD6</i>   | 3.728750848  |
| <i>HOXD10</i>   | 11.51907568  | <i>SVIP</i>    | -3.662563103 |
| <i>HOXD11</i>   | 2.998537142  | <i>TBX15</i>   | 9.499693723  |
| <i>HSPA4L</i>   | -6.417888004 | <i>TBX18</i>   | 5.023753737  |
| <i>HTR1F</i>    | 5.230995929  | <i>TGFB2</i>   | -8.750447068 |
| <i>HTR2A</i>    | 3.224492221  | <i>TIAM2</i>   | 3.641838934  |
| <i>IFIT2</i>    | -3.09684411  | <i>TNFSF15</i> | -3.208561644 |
| <i>IFITM10</i>  | 3.017262095  | <i>TOM1L1</i>  | -3.559699575 |
| <i>IGFBP5</i>   | -83.6131559  | <i>TSPAN18</i> | 6.53260725   |
| <i>IL11RA</i>   | 2.752604431  | <i>ZIC1</i>    | 8.165245944  |
| <i>ITGA8</i>    | 4.471799319  | <i>ZNF385D</i> | 5.732989384  |
